# Supplementary material for: Retrieval of Microphysical Parameters of Monsoonal rain Using X-band Dual-polarization Radar: Their Seasonal Dependence and Evaluation
Source: Copernicus journal article supplement (doi:10.5194/amt-2022-291), 2022-11-17
Supplement: Supplementary file [file amt-2022-291-AC2-supplement.pdf]

## **Response to reviewer 2 comments**

This paper deals with an interesting topic which is relevant to the community using Doppler radars for the estimation of rainfall and retrieving rain microphysical parameters thereby unravelling the structure of mesoscale convective systems.

The manuscript discusses different approaches for retrieving microphysical parameters from DROP-X radar and compared the results with a surface-based disdrometer. The manuscript is written well, and easy to follow. I strongly feel that the results are worth publishing in Atmospheric Measurement Technique (AMT). This topic is important to a variety of disciplines and scientists.

I strongly recommend the paper for publication in AMT after addressing the following minor comments/suggestions.

*We would like to thank the reviewer for strongly recommending the paper for publication with minor revision and also providing suggestions to improve the readability and quality of manuscript. We have implemented these minor suggestions in the revised manuscript.*

### **Minor comments and Suggestions:**

**Comment: Page 2: line 47: remove; after Ryzhkov and Zrnica, 2019;**

*Reply: corrected*

**Comment: Page 3: Line 92: Include Lavanya et al. 2019**

*Reply: The suggested reference (Lavanya et al. 2019) is added in the revised manuscript.*

**Comment:Page 6: line 188: 70 mmhr-1 (space between mm hr-1)**

*Reply: Corrected*

**Comment:Page 6: Include details of standard error bars in the Figure1 caption.**

*Reply: Details of standard error bars are included in Figure 1 caption.*

**Comment:Page 6: Figure 1 caption: Correct “seasonal ....” with “Seasonal ....”**

*Reply: Corrected.*

**Comment:Page 13: Table 4: Replace PMON with PRE**

*Reply: It is changed now as PRE*

**Comment:Page 18: Captions of Figure 7 and Figure 8 are interchanged.**

**Accordingly please correct them in the text.**

**Page 17: line 467: I think the authors are referring to Figure 8. (Dm, shape and slope parameters are shown) (Please see my above comment)**

*Reply: Sorry for the mistake. It is now corrected in the revised manuscript.*
